# Supplementary material for: Spinocerebellar Ataxia in a Hungarian Female Patient with a Novel Variant of Unknown Significance in the CCDC88C Gene
Source: MDPI journal article supplement (doi:10.3390/ijms24032617), 2023-01-30
Supplement: s1 [file s1]

Supplementary Table S3. Clinical characteristics of SCA40 patients published in the literature.

|                          | Family 1                                                 |                                                      | Family 2    |           |           |           | Family 3                                                               | Family 4     | Family 5                  |                                         |                  |                                           | Family 6                                           | Family 7                                                         | Family 8                                               |
|--------------------------|----------------------------------------------------------|------------------------------------------------------|-------------|-----------|-----------|-----------|------------------------------------------------------------------------|--------------|---------------------------|-----------------------------------------|------------------|-------------------------------------------|----------------------------------------------------|------------------------------------------------------------------|--------------------------------------------------------|
| Nationality              | Chinese                                                  |                                                      | Polish      |           |           |           | Sudanese                                                               | Kurdish      | Chinese                   |                                         |                  |                                           | Chinese                                            | Indian                                                           | Hungarian                                              |
| Mutation (DNA)           | c.1391G>A                                                |                                                      | c.127G>A    |           |           |           | c.1993G>A                                                              | c.5922T>G    | c.590G>A                  |                                         |                  |                                           | c.1886G>A                                          | c.3072C>A                                                        | c.607C>T                                               |
| Mutation (protein)       | p.R464H                                                  |                                                      | p.D43N      |           |           |           | p.E665K                                                                | p.S1974R     | p.R197Q                   |                                         |                  |                                           | p.R629Q                                            | p.F1024L                                                         | p.R203W                                                |
| Patient No.              | II-4                                                     | II-5                                                 | III-1       | IV-1      | IV-2      | IV-3      | F83-581                                                                | IV-3         | I-2                       | II-1                                    | II-5             | III-1                                     | II-3                                               | -                                                                | -                                                      |
| Sex                      | F                                                        | M                                                    | F           | F         | M         | M         | F                                                                      | F            | M                         | F                                       | F                | F                                         | M                                                  | M                                                                | F                                                      |
| Age (years)              | 65                                                       | 62                                                   | 84          | 63        | 59        | 53        | 48                                                                     | 27           | 72*                       | 62                                      | 51               | 39                                        | 61                                                 | 50                                                               | 65                                                     |
| Age at onset (years)     | 43                                                       | 42                                                   | NA          | 45        | 49        | 33        | childhood                                                              | 13           | 48                        | 42                                      | 40               | 35                                        | 59                                                 | 50                                                               | 62                                                     |
| First symptom(s)         | Gait ataxia, dysarthria                                  | Gait ataxia, dysarthria                              | UL tremor   | UL tremor | UL tremor | UL tremor | Gait problem (tip-toeing)                                              | Hand tremor  | NA                        | Unsteady gait, blurred vision           | Ocular dysmetria | Hand tremor                               | Hand tremor                                        | Unsteady gait                                                    | Gait ataxia, dizziness                                 |
| Gait ataxia              | +                                                        | +                                                    | NA          | +         | +         | +         | -                                                                      | +            | +                         | +                                       | +                | +                                         | +                                                  | +                                                                | +                                                      |
| UL ataxia                | +                                                        | +                                                    | NA          | NA        | NA        | NA        | -                                                                      | +            | NA                        | NA                                      | NA               | NA                                        | +                                                  | NA                                                               | +                                                      |
| LL ataxia                | +                                                        | +                                                    | NA          | NA        | NA        | NA        | -                                                                      | +            | NA                        | NA                                      | NA               | NA                                        | +                                                  | NA                                                               | +                                                      |
| Ocular dysmetria         | +                                                        | +                                                    | NA          | -         | -         | -         | -                                                                      | -            | NA                        | +                                       | +                | +                                         | -                                                  | +                                                                | -                                                      |
| Dysarthria               | +                                                        | +                                                    | NA          | -         | -         | -         | -                                                                      | +            | +                         | +                                       | +                | +                                         | +                                                  | +                                                                | -                                                      |
| Rest tremor              | -                                                        | -                                                    | +           | +         | +         | +         | -                                                                      | -            | +                         | +                                       | +                | +                                         | +                                                  | -                                                                | -                                                      |
| Action tremor            | -                                                        | -                                                    | +           | +         | +         | +         | -                                                                      | +            | NA                        | -                                       | -                | -                                         | -                                                  | -                                                                | -                                                      |
| Intention tremor         | +                                                        | -                                                    | +           | -         | +         | +         | -                                                                      | +            | NA                        | +                                       | -                | -                                         | +                                                  | -                                                                | +                                                      |
| Spasticity               | -                                                        | +                                                    | NA          | -         | -         | -         | +                                                                      | -            | NA                        | -                                       | -                | -                                         | +                                                  | +                                                                | +                                                      |
| Brisk tendon reflexes    | +                                                        | -                                                    | NA          | -         | +         | -         | +                                                                      | +            | NA                        | +                                       | +                | -                                         | +                                                  | +                                                                | -                                                      |
| Parkinsonism             | -                                                        | -                                                    | NA          | +         | +         | +         | -                                                                      | -            | +                         | +                                       | -                | -                                         | +                                                  | -                                                                | -                                                      |
| Dystonia                 | -                                                        | -                                                    | NA          | -         | -         | -         | -                                                                      | -            | NA                        | +                                       | +                | +                                         | +                                                  | +                                                                | -                                                      |
| Cognitive impairment     | -                                                        | -                                                    | +           | +         | +         | +         | -                                                                      | -            | -                         | +                                       | +                | -                                         | +                                                  | -                                                                | -                                                      |
| Other                    | -                                                        | Impaired vertical gaze                               | Head tremor | -         | -         | -         | Paraparesis, Babinski sign, foot deformities                           | Voice tremor | -                         | Paroxysmal limb jitter, Babinski sign   | -                | Paroxysmal limb jitter                    | Chorea/ dyskinesia, dysphagia, anxiety, depression | -                                                                | Divergent strabism, dizziness                          |
| SARA (0-40 points)       | 24                                                       | 22                                                   | NA          | 5         | 10        | 3         | NA                                                                     | 14           | NA                        | 17                                      | 10               | 6                                         | 18                                                 | NA                                                               | 5                                                      |
| MMSE (0-30 points)       | NA                                                       | NA                                                   | NA          | NA        | NA        | NA        | NA                                                                     | 29           | NA                        | 21                                      | 20               | 30                                        | 20                                                 | NA                                                               | NA                                                     |
| ACE (0-100 points)       | NA                                                       | NA                                                   | NA          | 79        | 84        | 82        | NA                                                                     | NA           | NA                        | NA                                      | NA               | NA                                        | NA                                                 | NA                                                               | NA                                                     |
| Brain MRI                | Mild pontine and cerebellar atrophy, moderate WM lesions | Mild pontine and cerebellar atrophy, mild WM lesions | NA          | Norma l   | Norma l   | Normal    | Periventricular leukomalacia with ischemic foci (WM, cerebellum, pons) | Normal       | Age-related brain atrophy | Severe cerebellar, mild pontine atrophy | Normal           | Moderate cerebellar, mild pontine atrophy | Mild cerebellar and pontine atrophy                | Cerebellar and brainstem atrophy, bilateral olivary degeneration | Mild cerebellar (mainly vermian), mild frontal atrophy |
| Nerve conduction studies | NA                                                       | NA                                                   | NA          | NA        | NA        | NA        | Normal                                                                 | NA           | NA                        | Demyelination of motor nerves           | LL neuropathy    | NA                                        | NA                                                 | Normal                                                           | Normal                                                 |
| Reference                | 2                                                        |                                                      | 4           |           |           |           | 5                                                                      | 6            | 7                         |                                         |                  |                                           | 8                                                  | 9                                                                | current MS                                             |

+: present, -: not present, \*: died

ACE: Addenbrooke's Cognitive Examination, F: female, LL: lower limb, M: male, MMSE: Mini-Mental State Examination, MRI: magnetic resonance imaging, NA: not available, SARA: Scale for the Assessment and Rating of Ataxia, UL: upper limb, WM: white matter
