# Supplementary material for: Spinocerebellar Ataxia in a Hungarian Female Patient with a Novel Variant of Unknown Significance in the CCDC88C Gene
Source: MDPI journal article supplement (doi:10.3390/ijms24032617), 2023-01-30
Supplement: s1 [file s1]

## Supplementary Tables

**Supplementary Table S1. Oligos used for mutagenesis**

|                                            |                                                              |
|--------------------------------------------|--------------------------------------------------------------|
| <i>CCDC88C<sup>D43N</sup> (Asp43Asn)</i>   |                                                              |
| Fwd                                        | 5'-GACTATGTACATGGATTTAGTG <sup>A</sup> ACGGCATCTTTTTGAACC-3' |
| Rev                                        | 5'-GGTTCAAAAAGATGCCGT <sup>T</sup> CACTAAATCCATGTACATAGTC-3' |
| <i>CCDC88C<sup>R203W</sup> (Arg203Trp)</i> |                                                              |
| Fwd                                        | 5'-GGCTCATCGACCAG <sup>T</sup> GGGACGAGTGCACCG-3'            |
| Rev                                        | 5'-CGGTGCACTCGTCCC <sup>A</sup> CTGGTCGATGAGCC-3'            |
| <i>CCDC88C<sup>R464H</sup> (Arg464His)</i> |                                                              |
| Fwd                                        | 5'-CGAATGTGCGTCCAGCC <sup>A</sup> CATCCTGAAGCTGGAG-3'        |
| Rev                                        | 5'-CTCCAGCTTCAGGATG <sup>T</sup> TGGCTGGACGCACATTTCG-3'      |
| <i>CCDC88C<sup>E665K</sup> (Glu665Lys)</i> |                                                              |
| Fwd                                        | 5'-GAAAGTCGAGGCCCTG <sup>A</sup> AGCATGAGAGCCAGGG-3'         |
| Rev                                        | 5'-CCCTGGCTCTCATGCT <sup>T</sup> CAGGGCCTCGACTTTC-3'         |

**Supplementary Table S2. Oligos used for cloning**

|                                   |                                                                  |
|-----------------------------------|------------------------------------------------------------------|
| Mini prom BglII Fw:               | 5'-gatctTAGAGGGTATATAATGGAAGCTCGACTTCCa -3'                      |
| Mini prom Hind3<br>Rev:           | 5'-agcttGGAAGTCGAGCTTCCATTATATACCCTCTAa-3'                       |
| AP1-response<br>element SacI Fwd: | 5'-cTGAGTCAGTGACTCAGTGAGTCAGTGACTCAGTGAGTCAGTGACTCAGc-3'         |
| AP1-response<br>element XhoI Rev: | 5'-tcgagCTGAGTCACTGACTCACTGAGTCACTGACTCACTGAGTCACTGACTCAgagct-3' |
